# Supplementary material for: Development and Validation of an Ultrasound-Based Radiomics Nomogram for Identifying HER2 Status in Patients with Breast Carcinoma
Source: MDPI journal article supplement (doi:10.3390/diagnostics12123130), 2022-12-12
Supplement: s1 [file s1]

Rad-score=

-0.076092\*original\_glszm\_SmallAreaEmphasis +  
-0.033653\*wavelet-HLL\_gldm\_DependenceNonUniformityNormalized+  
-0.020703\*wavelet-HLL\_firstorder\_90Percentile+  
-0.013013\*wavelet-LHL\_glszm\_SmallAreaLowGrayLevelEmphasis+  
-0.011322\*original\_shape\_Elongation+  
-0.010225\*wavelet-HLL\_glszm\_GrayLevelNonUniformityNormalized +  
-0.00703\*wavelet-HLH\_firstorder\_Mean+  
0.005098\*wavelet-LHH\_glszm\_SizeZoneNonUniformityNormalized+  
0.008385\*wavelet-LHH\_glszm\_HighGrayLevelZoneEmphasis+  
0.010776\*wavelet-HHH\_firstorder\_Median+  
0.020412\*wavelet-HLL\_glcm\_JointEntropy+  
0.047259\*wavelet-LHL\_glcm\_Idn
