# Supplementary material for: Development and Validation of an Ultrasound-Based Radiomics Nomogram for Identifying HER2 Status in Patients with Breast Carcinoma
Source: MDPI journal article supplement (doi:10.3390/diagnostics12123130), 2022-12-12
Supplement: s1 [file s1]

**Supplementary table** The morphological characteristics of the 50 randomly selected lesions

| <b>Morphological feature</b> | <b>Number</b> |
|------------------------------|---------------|
| Internal echo                |               |
| Homogeneous                  | 2             |
| Not homogeneous              | 48            |
| Mass margin                  |               |
| Circumscribed                | 3             |
| Not circumscribed            | 47            |
| Mass shape                   |               |
| Round or oval                | 2             |
| Irregular                    | 48            |
| Composition                  |               |
| Cystic-solid mixture         | 1             |
| Solid, dominantly solid      | 49            |
| Echogenicity                 |               |
| Isoechoic                    | 1             |
| Hypoechoic                   | 49            |
