# Supplementary material for: Development and Validation of an Ultrasound-Based Radiomics Nomogram for Identifying HER2 Status in Patients with Breast Carcinoma
Source: MDPI journal article supplement (doi:10.3390/diagnostics12123130), 2022-12-12
Supplement: s1 [file s1]

## #Details related to feature extraction

# This is an example of a parameters file

# It is written according to the YAML-convention ([www.yaml.org](http://www.yaml.org)) and is checked by the code for consistency.

# Three types of parameters are possible and reflected in the structure of the document:

#

# Parameter category:

#   Setting Name: <value>

#

# The three parameter categories are:

# - setting: Setting to use for preprocessing and class specific settings. if no <value> is specified, the value for

#   this setting is set to None.

# - featureClass: Feature class to enable, <value> is list of strings representing enabled features. If no <value> is

#   specified or <value> is an empty list ('[]'), all features for this class are enabled.

# - imageType: image types to calculate features on. <value> is custom kwarg settings (dictionary). if <value> is an

#   empty dictionary ('{}'), no custom settings are added for this input image.

#

# Some parameters have a limited list of possible values. Where this is the case, possible values are listed in the

# package documentation

# Settings to use, possible settings are listed in the documentation (section "Customizing the extraction").

setting:

    binWidth: 25

    label: 1

    interpolator: 'sitkBSpline' # This is an enumerated value, here None is not allowed

    resampledPixelSpacing: # This disables resampling, as it is interpreted as None, to enable it, specify spacing in x, y, z as [x, y, z]

    weightingNorm: # If no value is specified, it is interpreted as None

# Image types to use: "Original" for unfiltered image, for possible filters, see documentation.

imageType:

    Original: {} # for dictionaries / mappings, None values are not allowed, '{}' is interpreted as an empty dictionary

    LoG:

        # Because of resampling to (3, 3, 3), the use of sigmas < 3 mm is not recommended.

        sigma: [3.0, 5.0]

    Wavelet: {}

# Featureclasses, from which features must be calculated. If a featureclass is not mentioned, no features are calculated

# for that class. Otherwise, the specified features are calculated, or, if none are specified, all are calculated (excluding redundant/deprecated features).

featureClass:

# redundant Compactness 1, Compactness 2 and Spherical Disproportion features are disabled by default, they can be

# enabled by specifying individual feature names (as is done for glcm) and including them in the list.

shape:

firstorder: [] # specifying an empty list has the same effect as specifying nothing.

glcm: # Disable SumAverage by specifying all other GLCM features available

- 'Autocorrelation'
- 'JointAverage'
- 'ClusterProminence'
- 'ClusterShade'
- 'ClusterTendency'
- 'Contrast'
- 'Correlation'
- 'DifferenceAverage'
- 'DifferenceEntropy'
- 'DifferenceVariance'
- 'JointEnergy'
- 'JointEntropy'
- 'Imc1'
- 'Imc2'
- 'Idm'
- 'Idmn'
- 'Id'
- 'Idn'
- 'InverseVariance'
- 'MaximumProbability'
- 'SumEntropy'
- 'SumSquares'

glrlm: # for lists none values are allowed, in this case, all features are enabled

glszm:

gldm: # contains deprecated features, but as no individual features are specified, the deprecated features are not enabled
